# Supplementary figures and images for: TRAF4/6 Is Needed for CD44 Cleavage and Migration via RAC1 Activation
Source: MDPI journal article supplement (doi:10.3390/cancers13051021), 2021-03-01

**Figure 1**

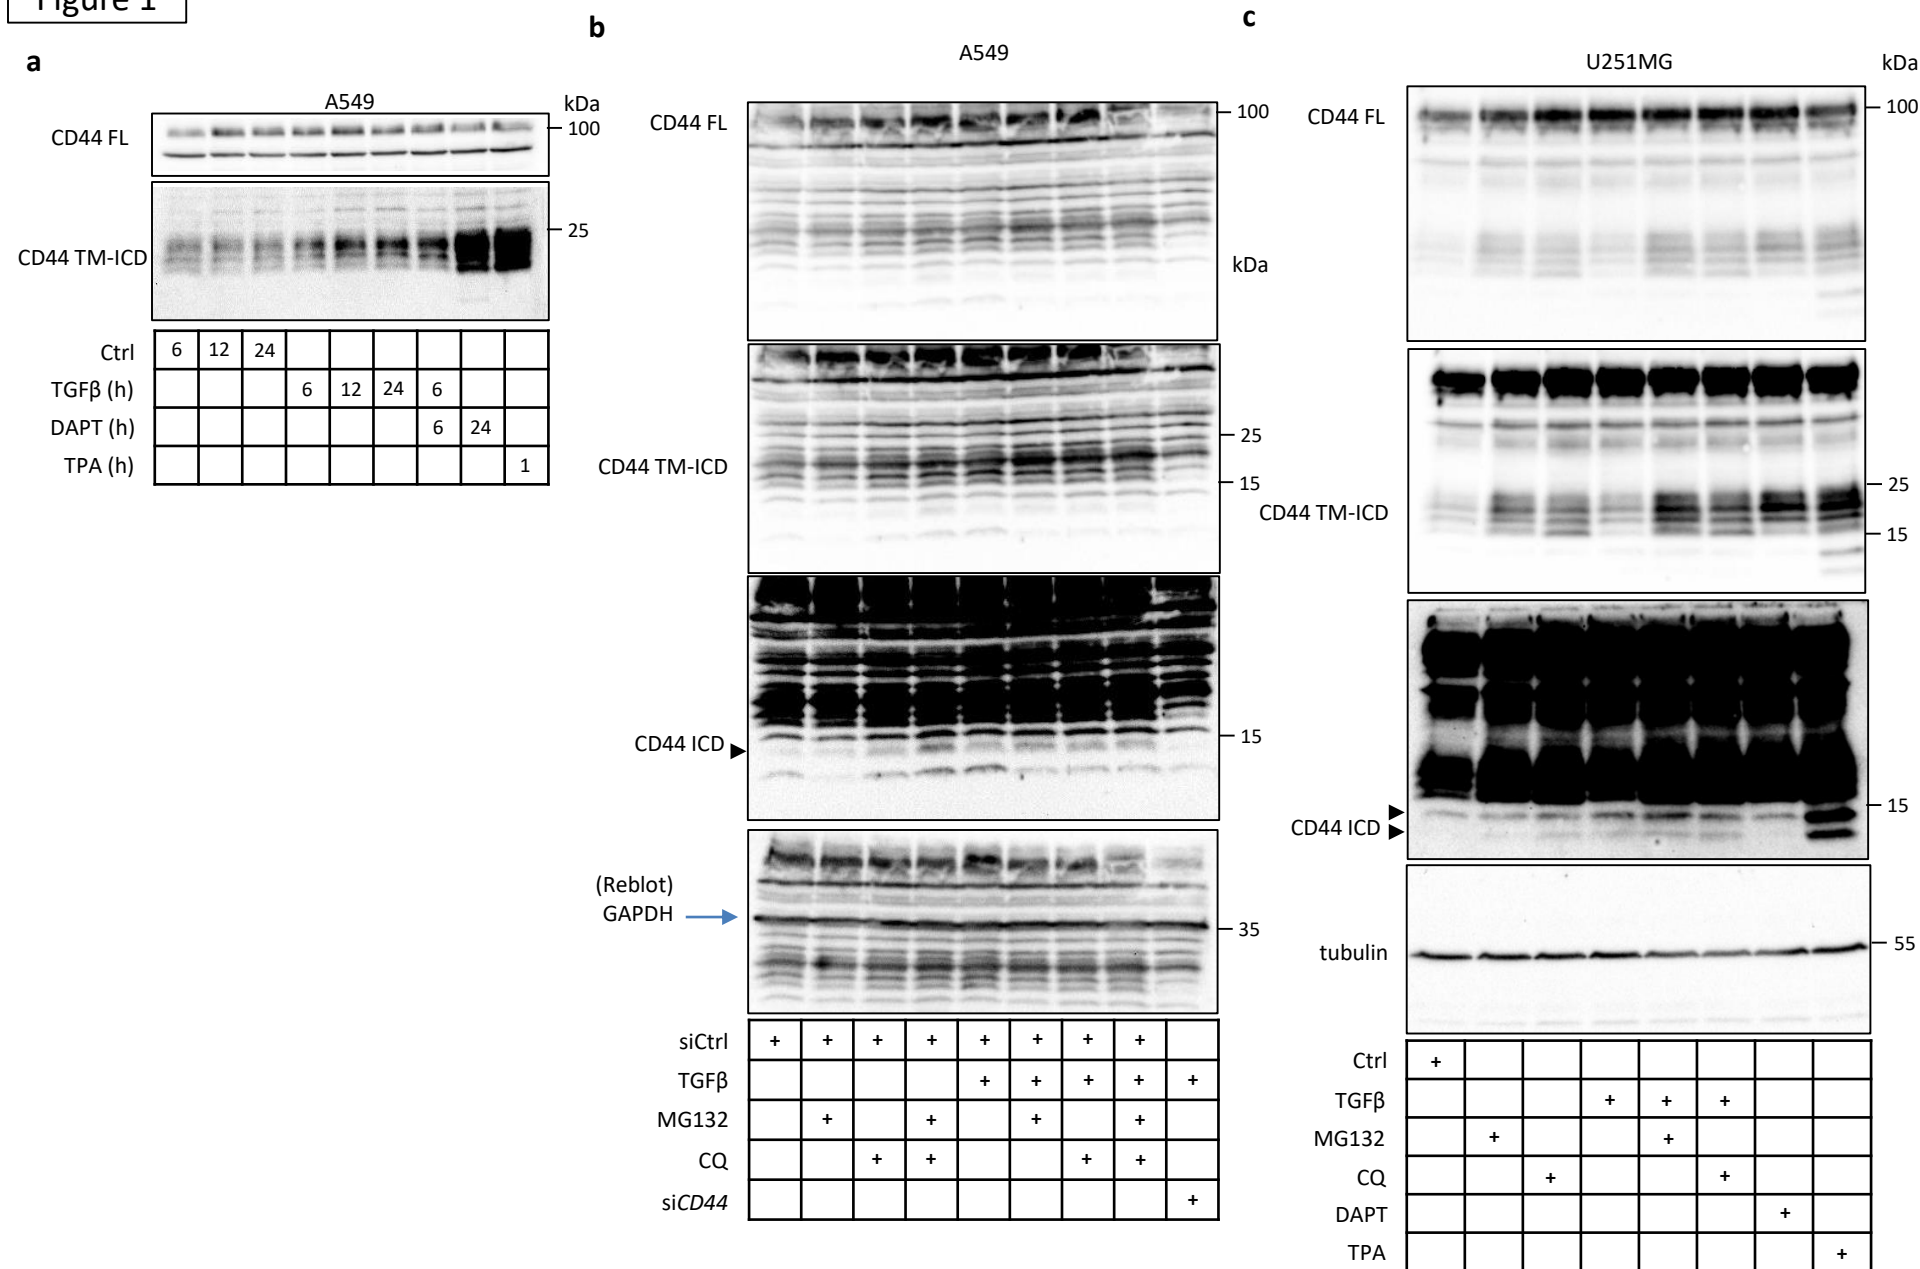

Figure 2

e

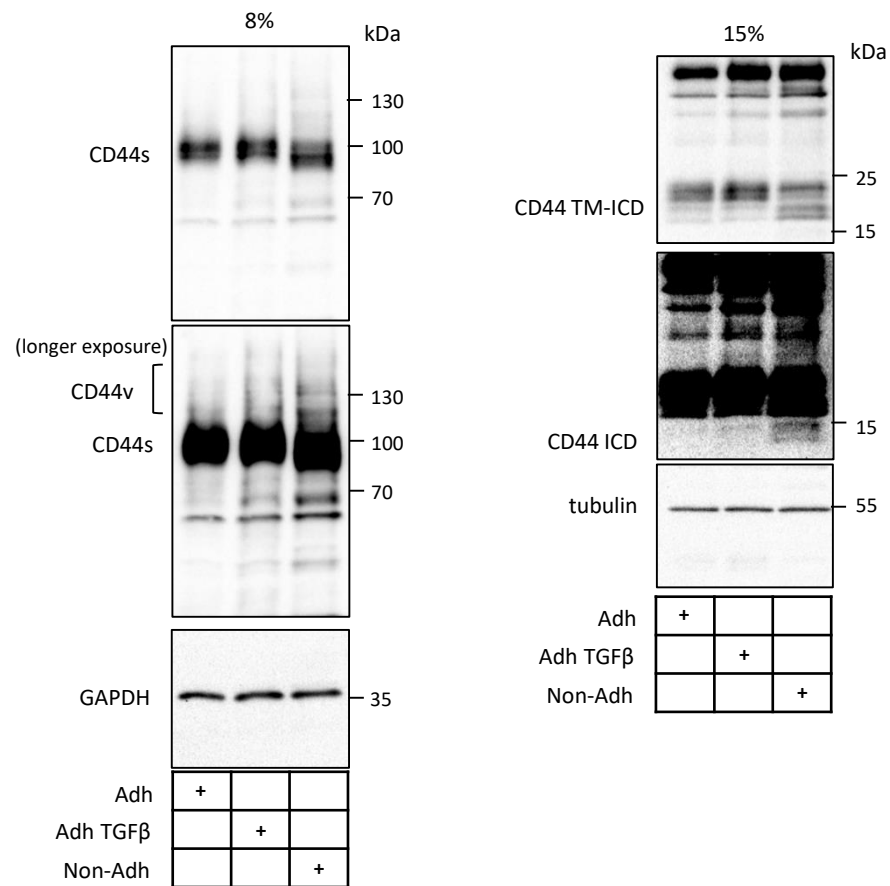

Figure 3

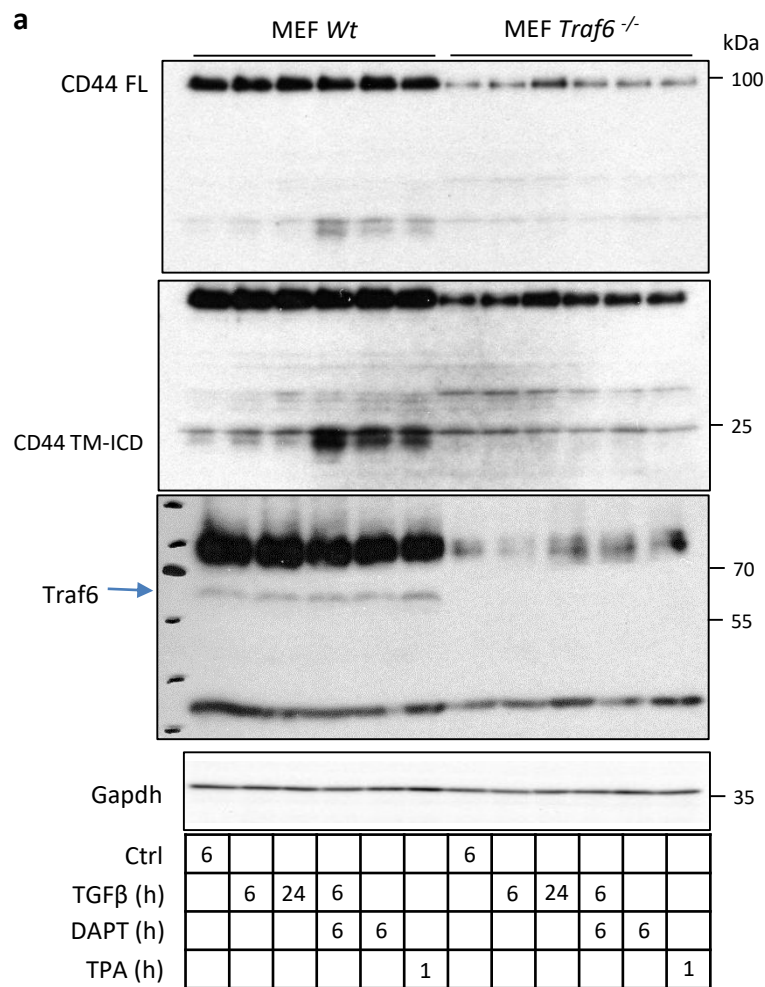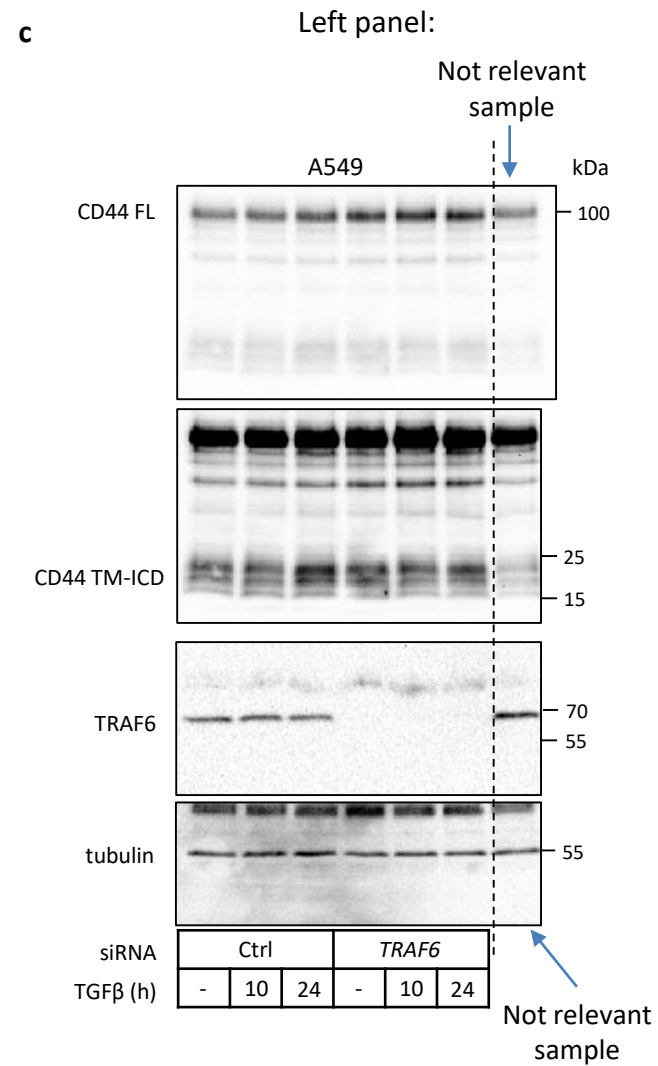

Figure 3 continued

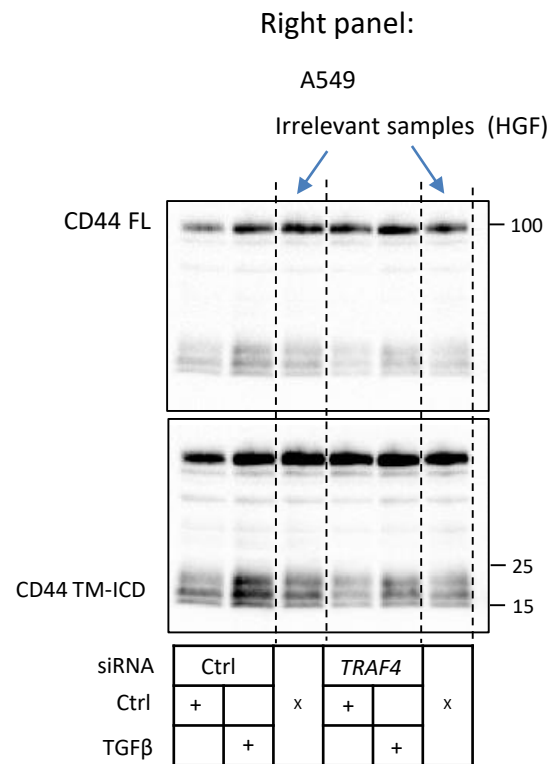

Figure 4

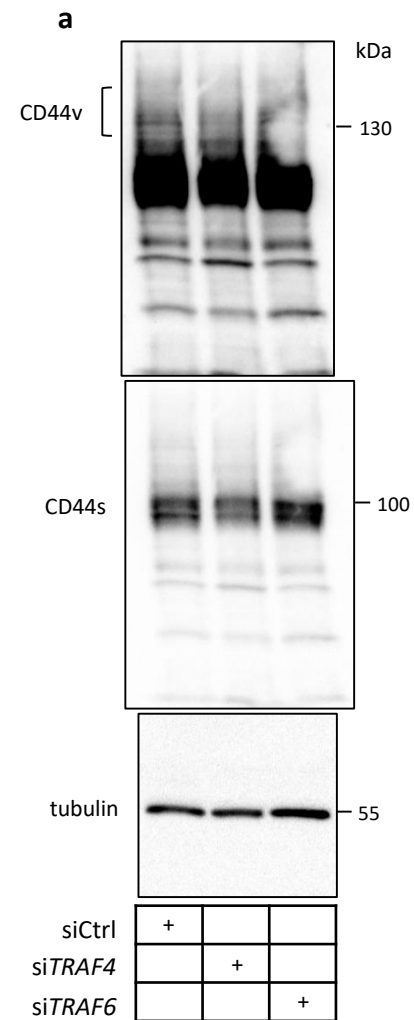

Figure 5

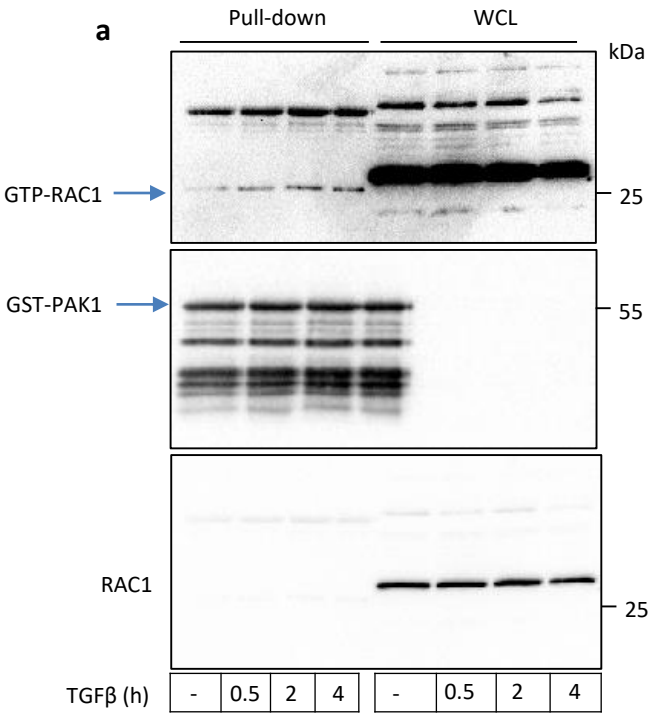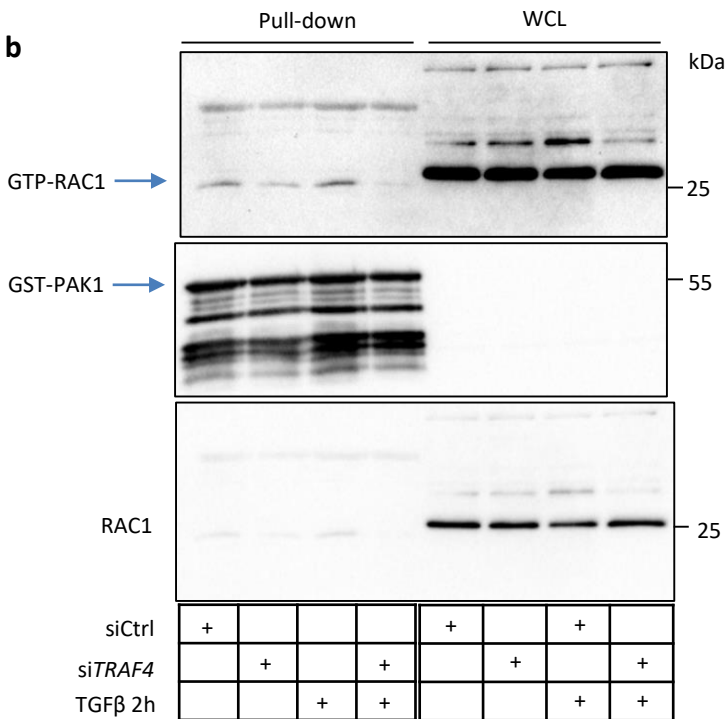

Figure 5 continued

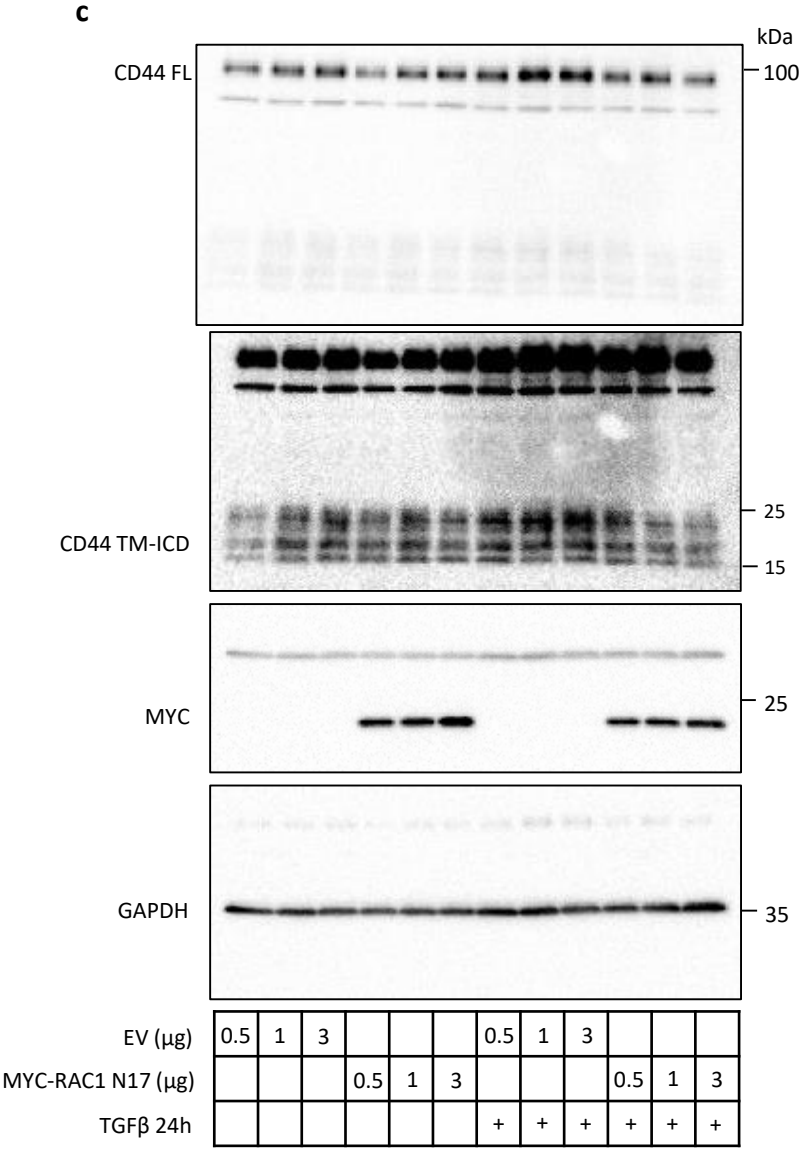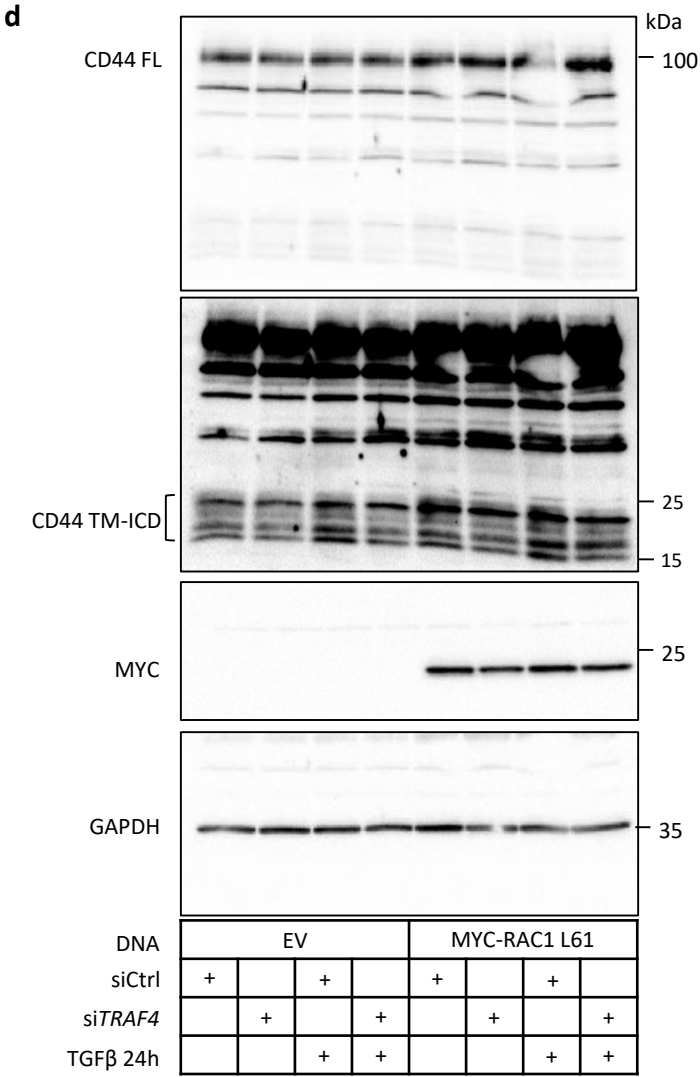

Figure S1

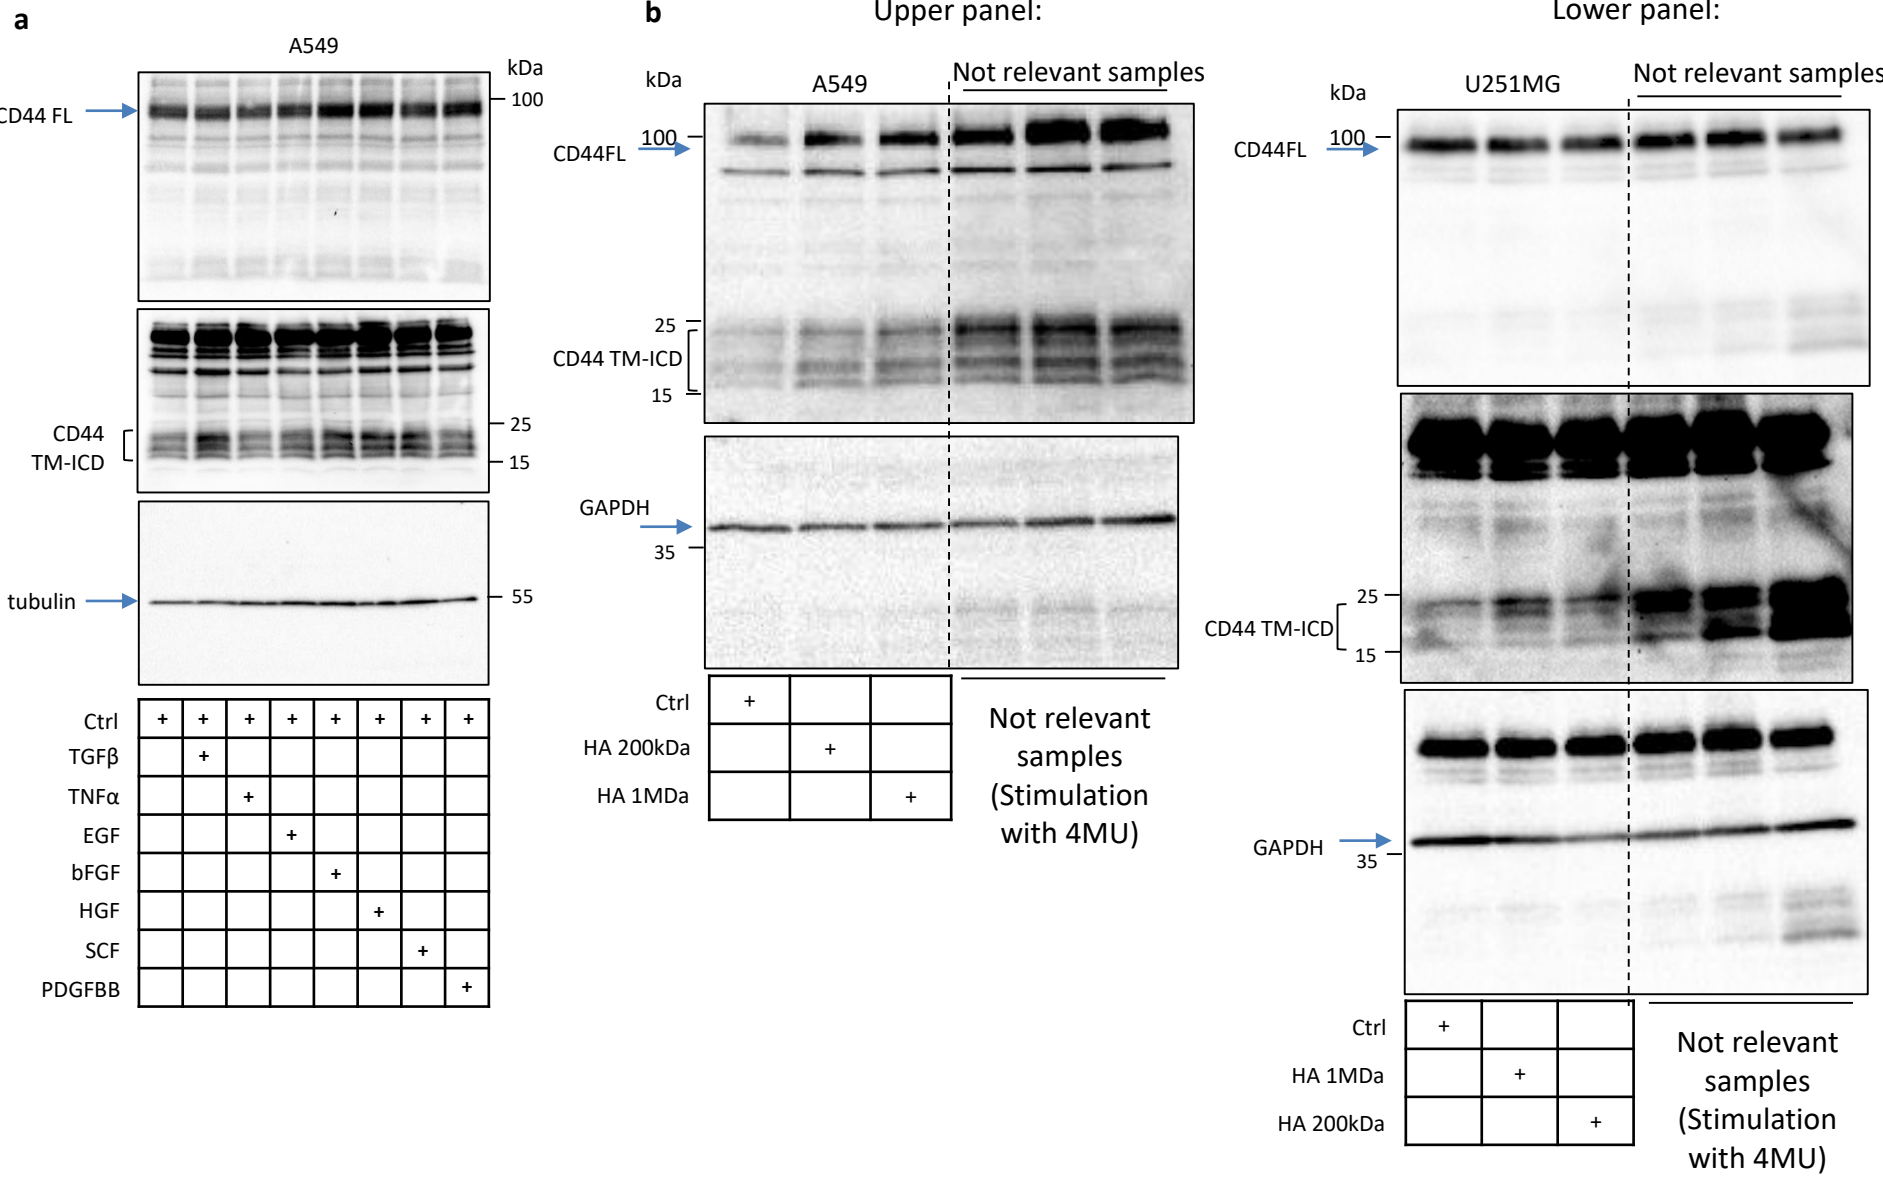





Figure S2

a

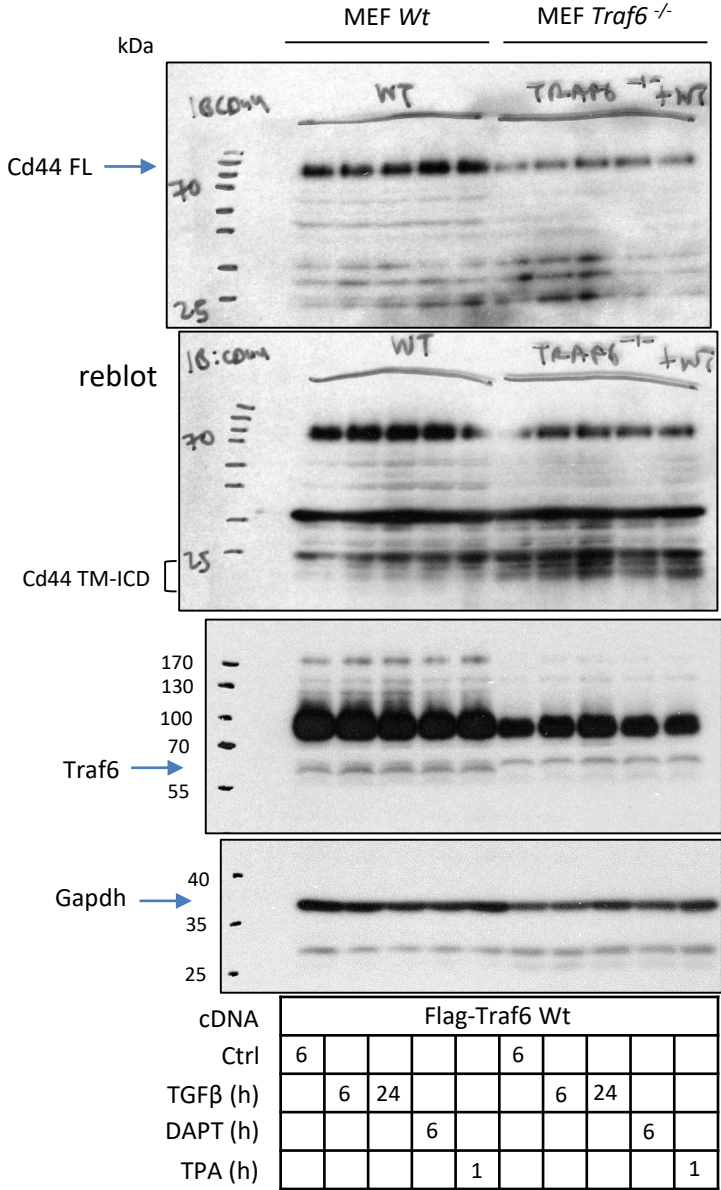

b

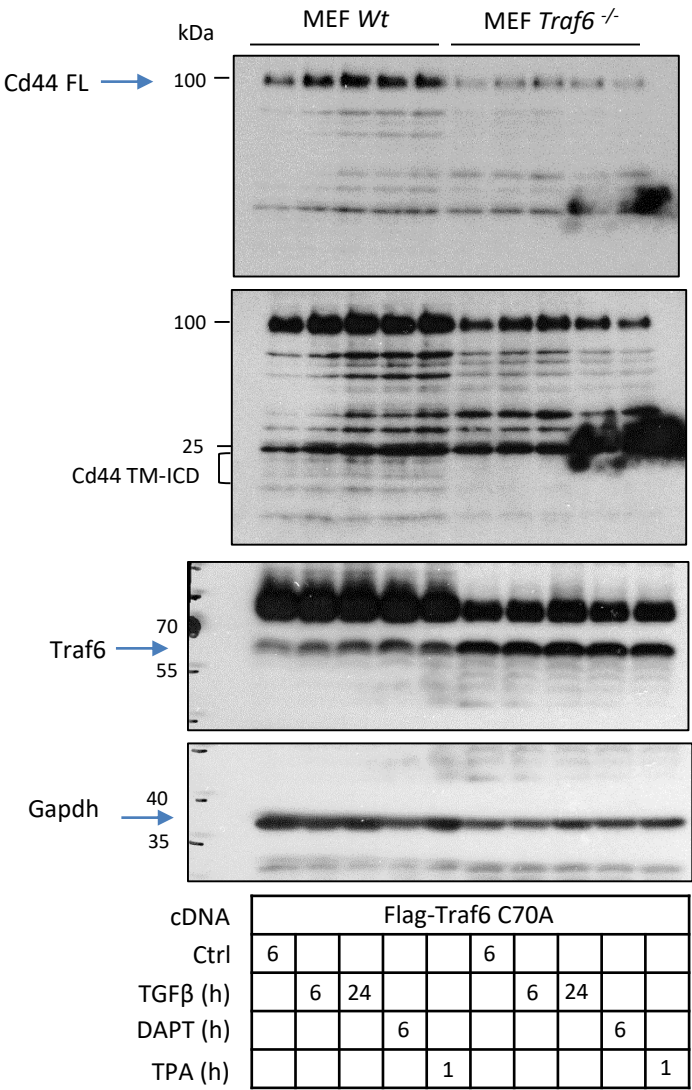

Supplement: s1 [file s1]
